# Supplementary material for: Inferring circuit mechanisms from sparse neural recording and global perturbation in grid cells
Source: eLife journal article supplement (doi:10.7554/elife.33503), 2018-07-09

**a***E and I perturbation*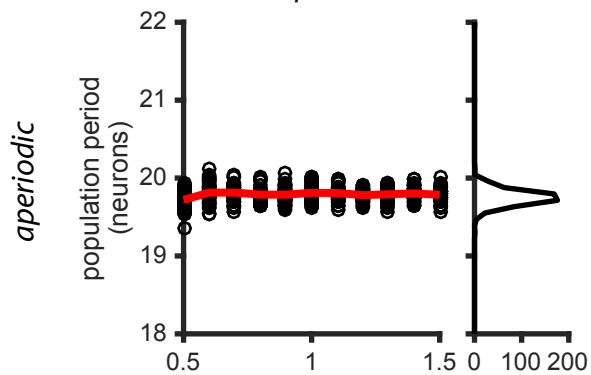**b***E perturbation only*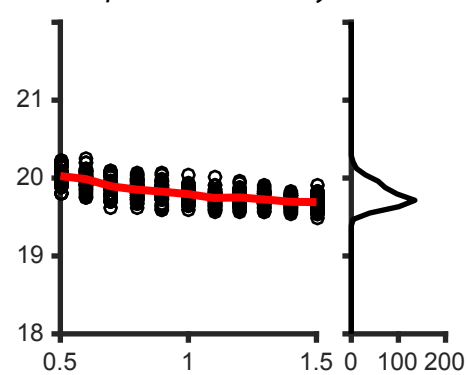**c***I perturbation only*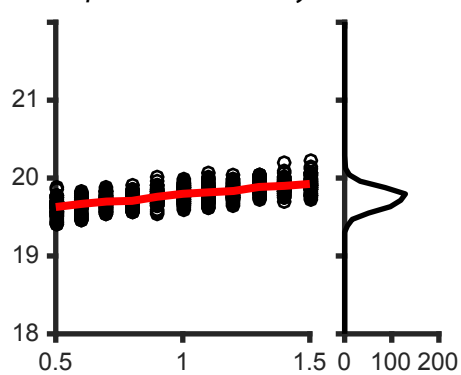*partially periodic*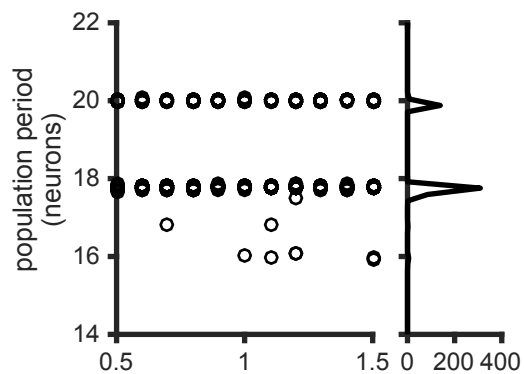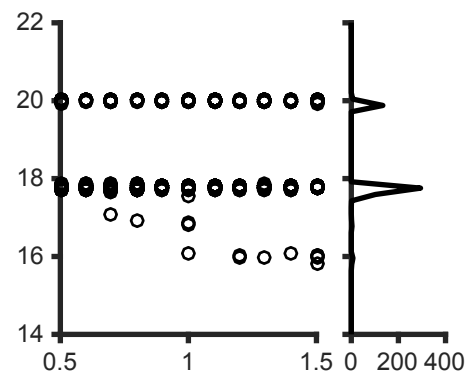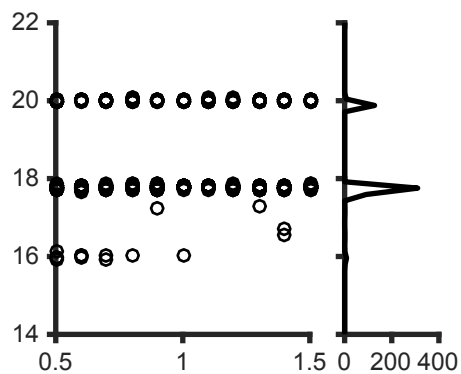*fully periodic*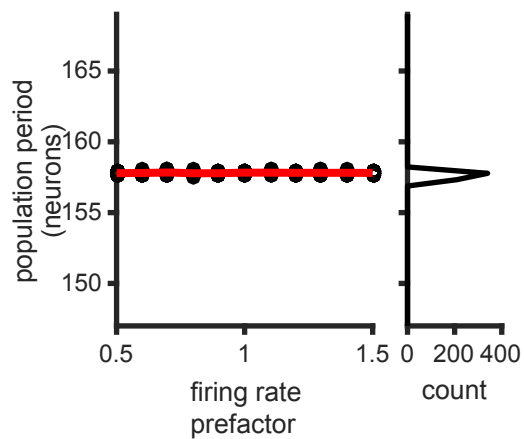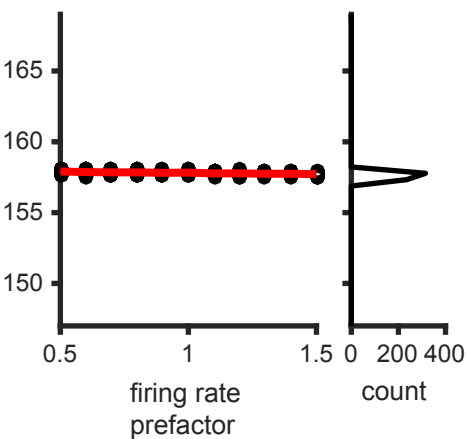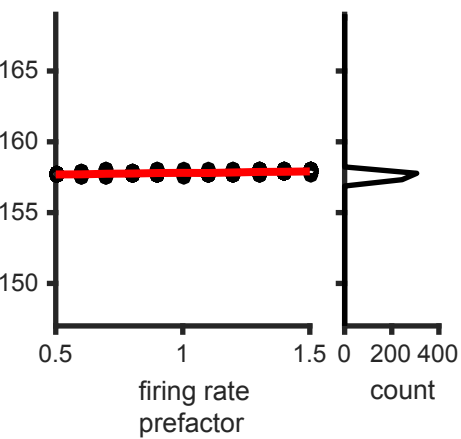

Supplement: supp [file elife_poa_e33503_Figure_5_figure_supplement_3.pdf › elife_poa_e33503_Figure_5_figure_supplement_3.pdf]
