# Supplementary figures and images for: Inferring circuit mechanisms from sparse neural recording and global perturbation in grid cells
Source: eLife journal article supplement (doi:10.7554/elife.33503), 2018-07-09

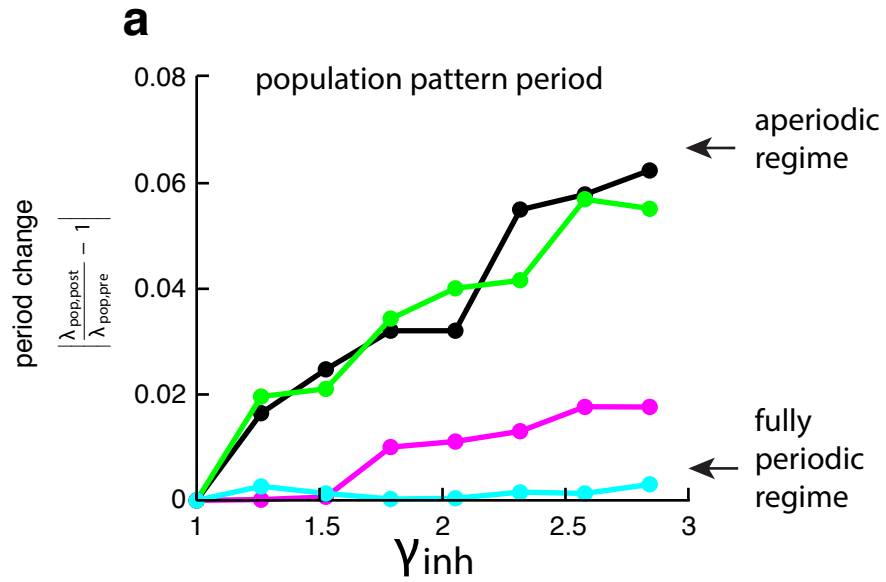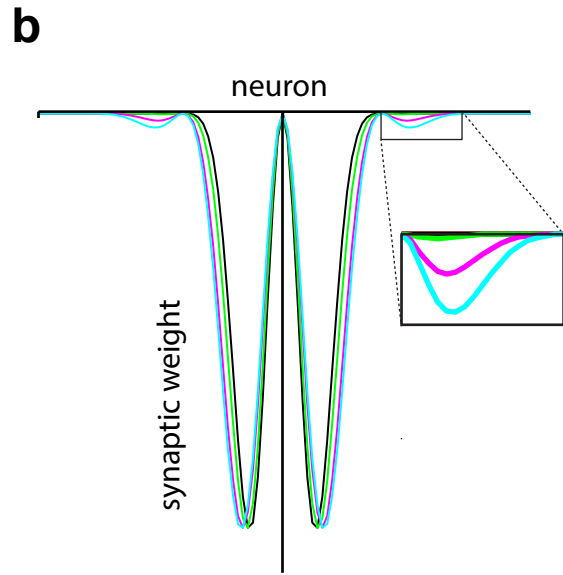

Supplement: supp [file elife_poa_e33503_Figure_1_figure_supplement_1.pdf › elife_poa_e33503_Figure_1_figure_supplement_1.pdf]

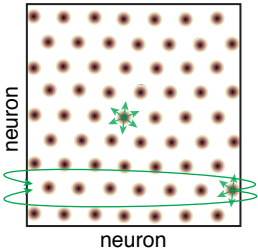

Supplement: supp [file elife_poa_e33503_Figure_1_figure_supplement_2.pdf › elife_poa_e33503_Figure_1_figure_supplement_2.pdf]

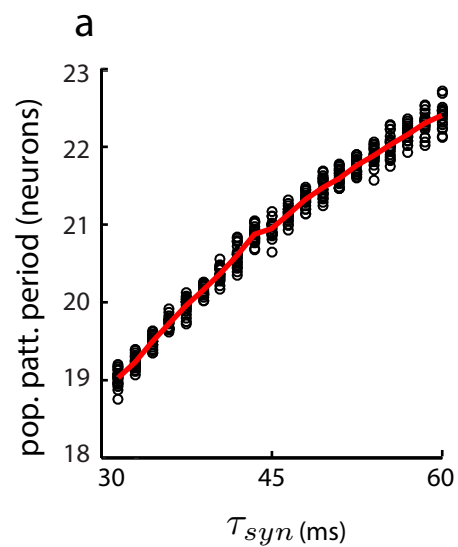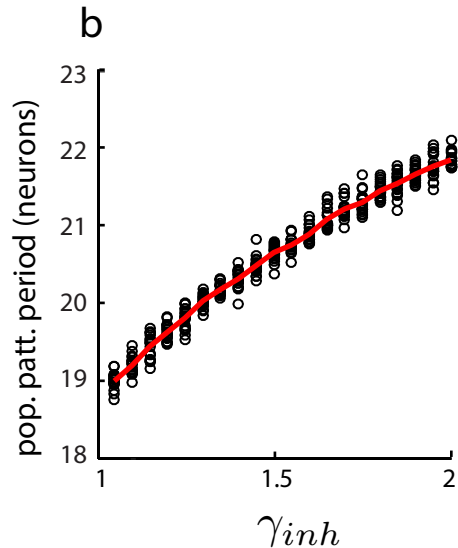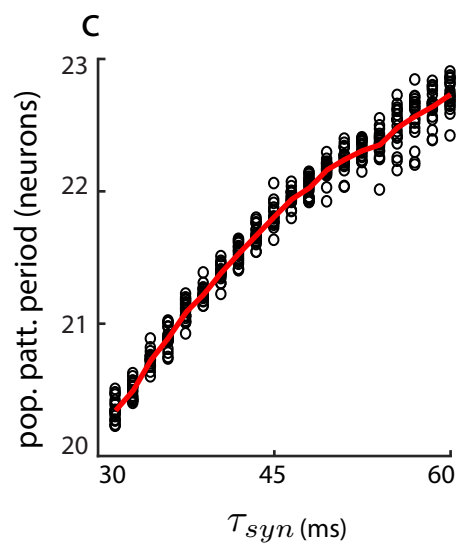

Supplement: supp [file elife_poa_e33503_Figure_2_figure_supplement_1.pdf › elife_poa_e33503_Figure_2_figure_supplement_1.pdf]

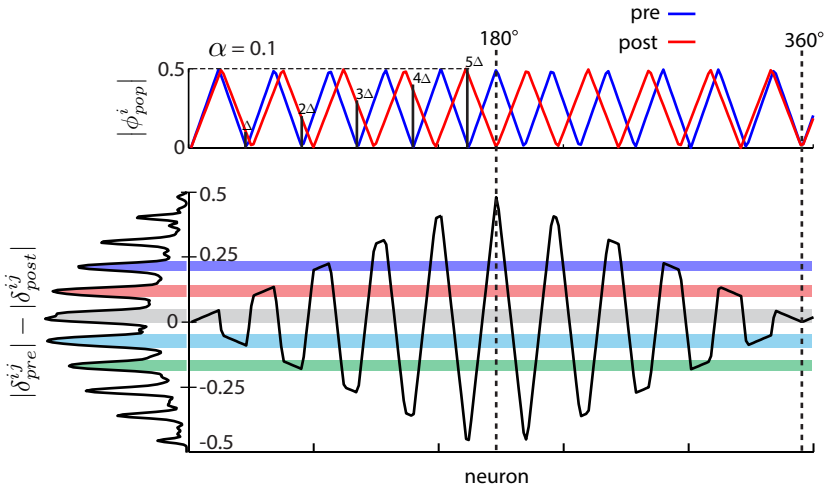

Supplement: supp [file elife_poa_e33503_Figure_2_figure_supplement_2.pdf › elife_poa_e33503_Figure_2_figure_supplement_2.pdf]

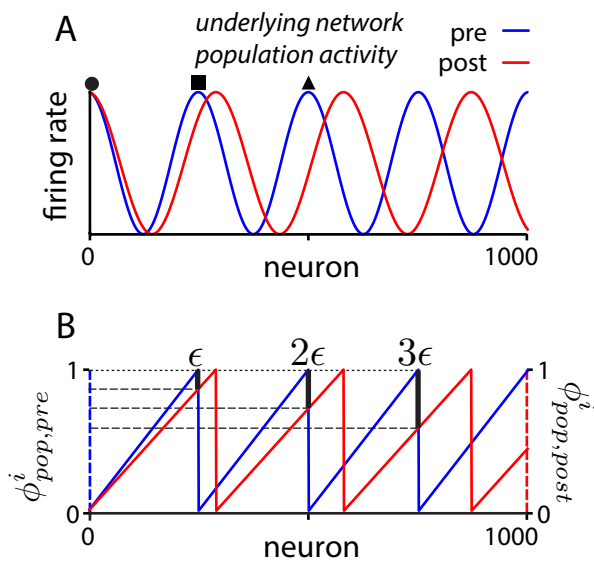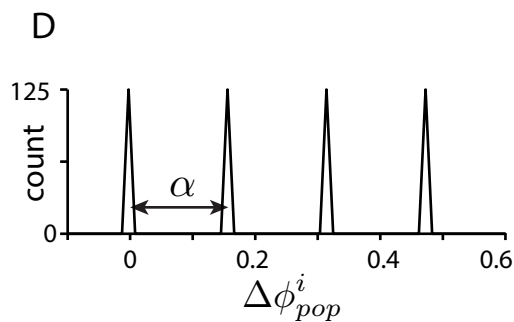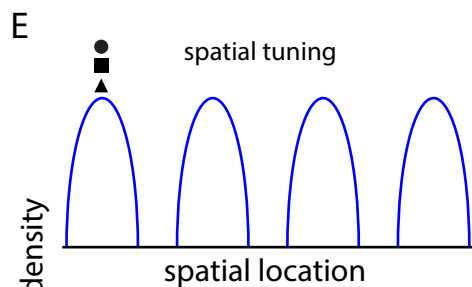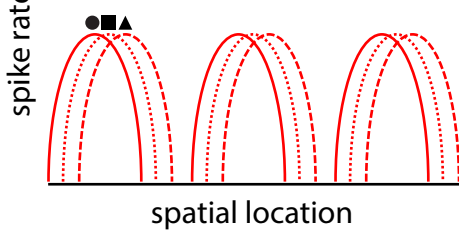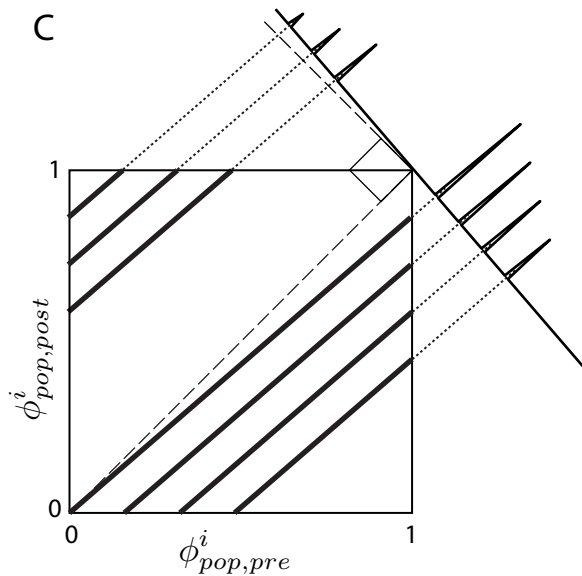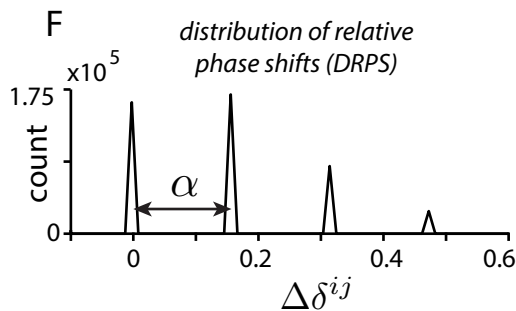

Supplement: supp [file elife_poa_e33503_Figure_2_figure_supplement_3.pdf › elife_poa_e33503_Figure_2_figure_supplement_3.pdf]

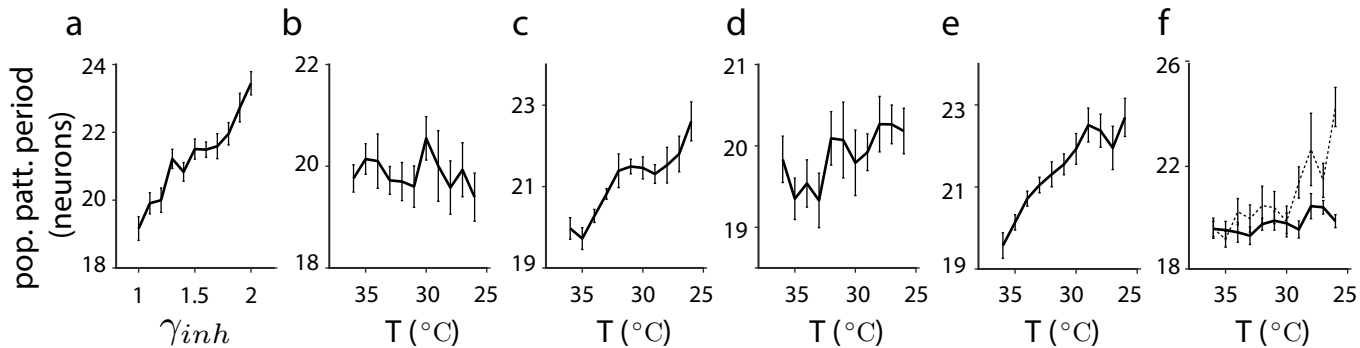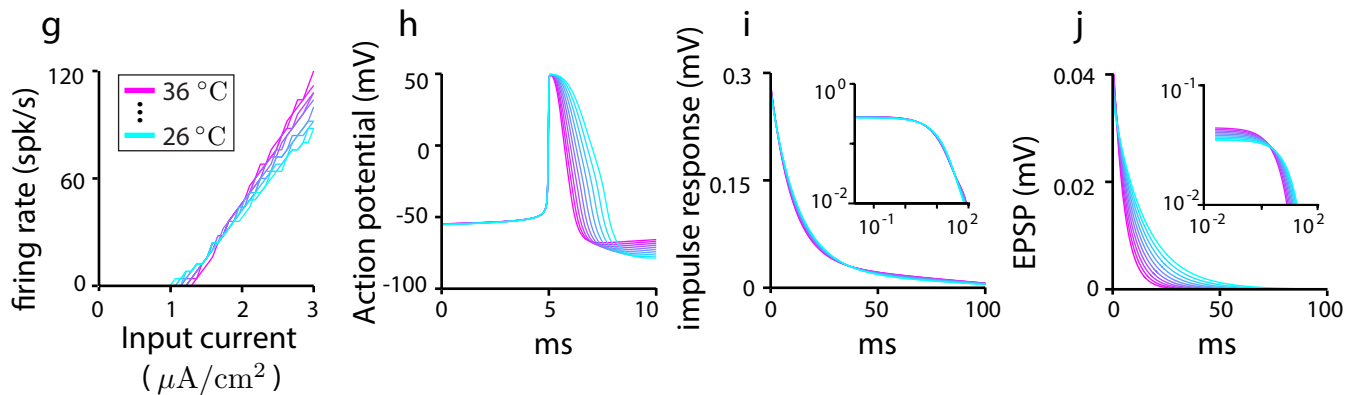

Supplement: supp [file elife_poa_e33503_Figure_2_figure_supplement_4.pdf › elife_poa_e33503_Figure_2_figure_supplement_4.pdf]

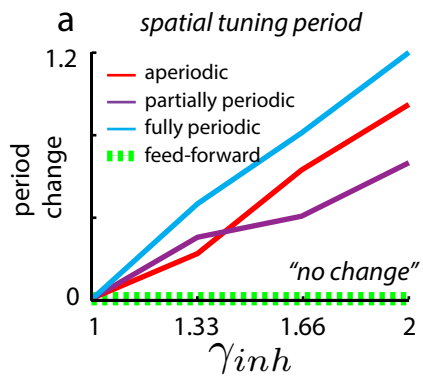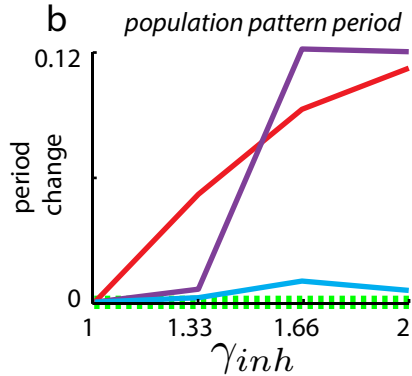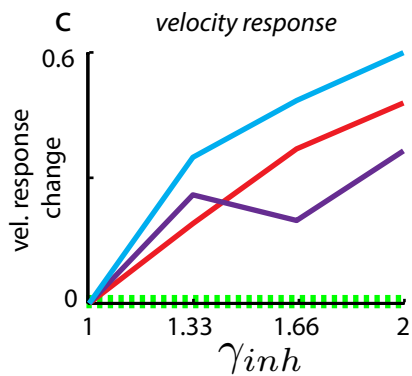

Supplement: supp [file elife_poa_e33503_Figure_3_figure_supplement_1.pdf › elife_poa_e33503_Figure_3_figure_supplement_1.pdf]

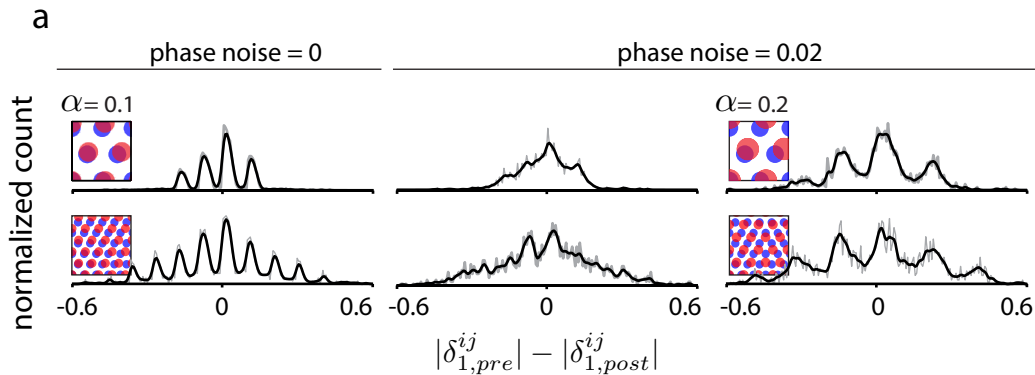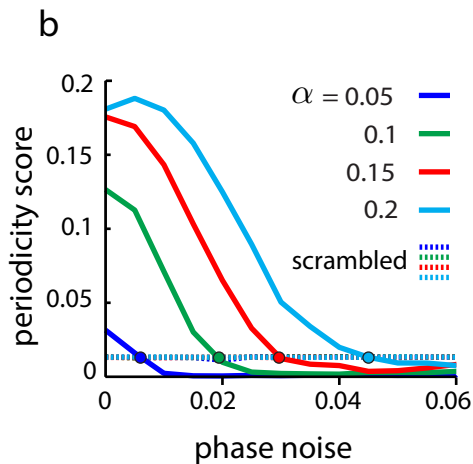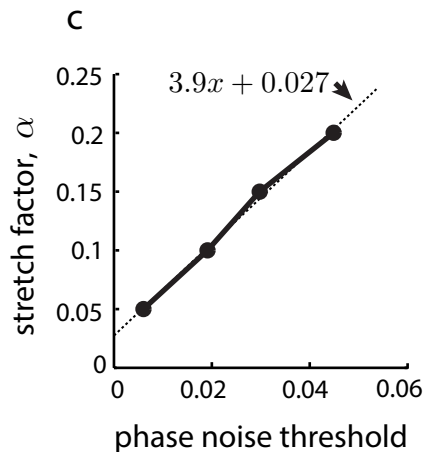

Supplement: supp [file elife_poa_e33503_Figure_4_figure_supplement_1.pdf › elife_poa_e33503_Figure_4_figure_supplement_1.pdf]

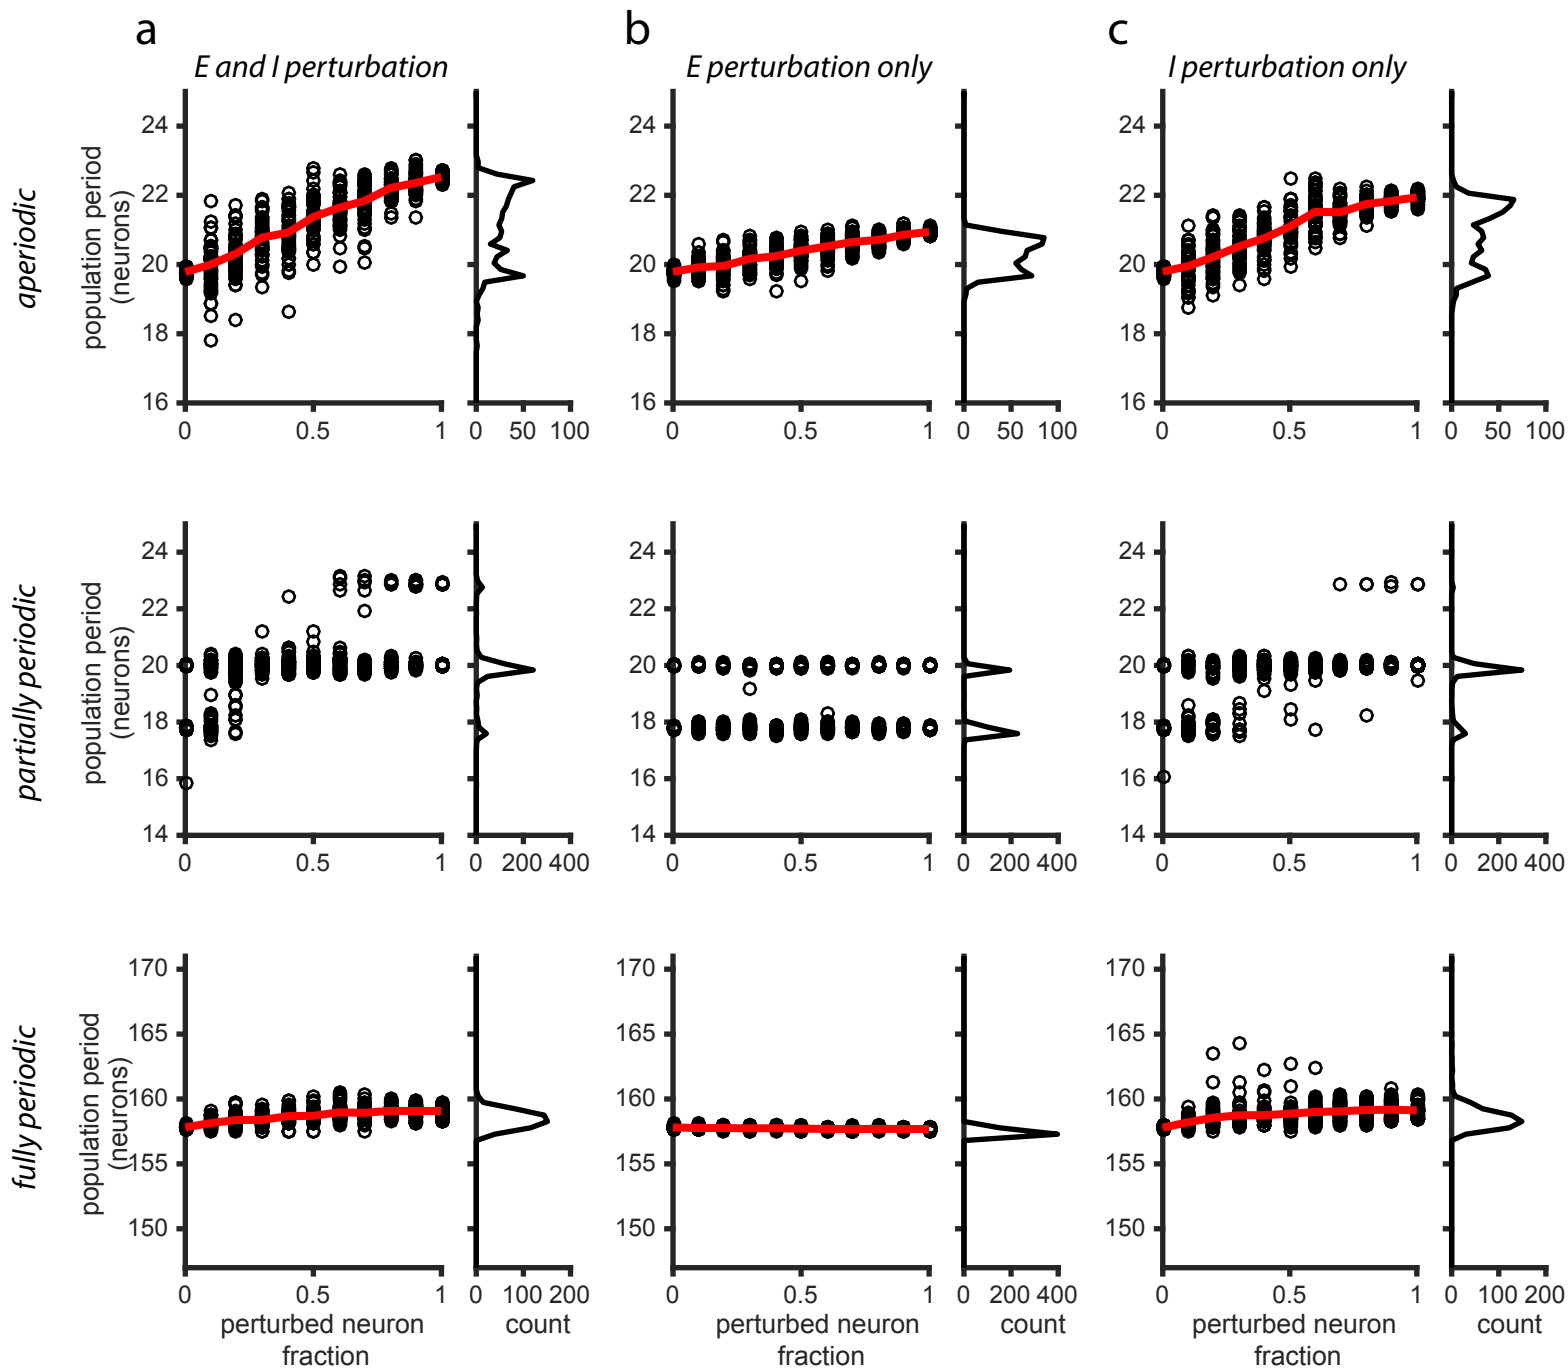

Supplement: supp [file elife_poa_e33503_Figure_5_figure_supplement_1.pdf › elife_poa_e33503_Figure_5_figure_supplement_1.pdf]

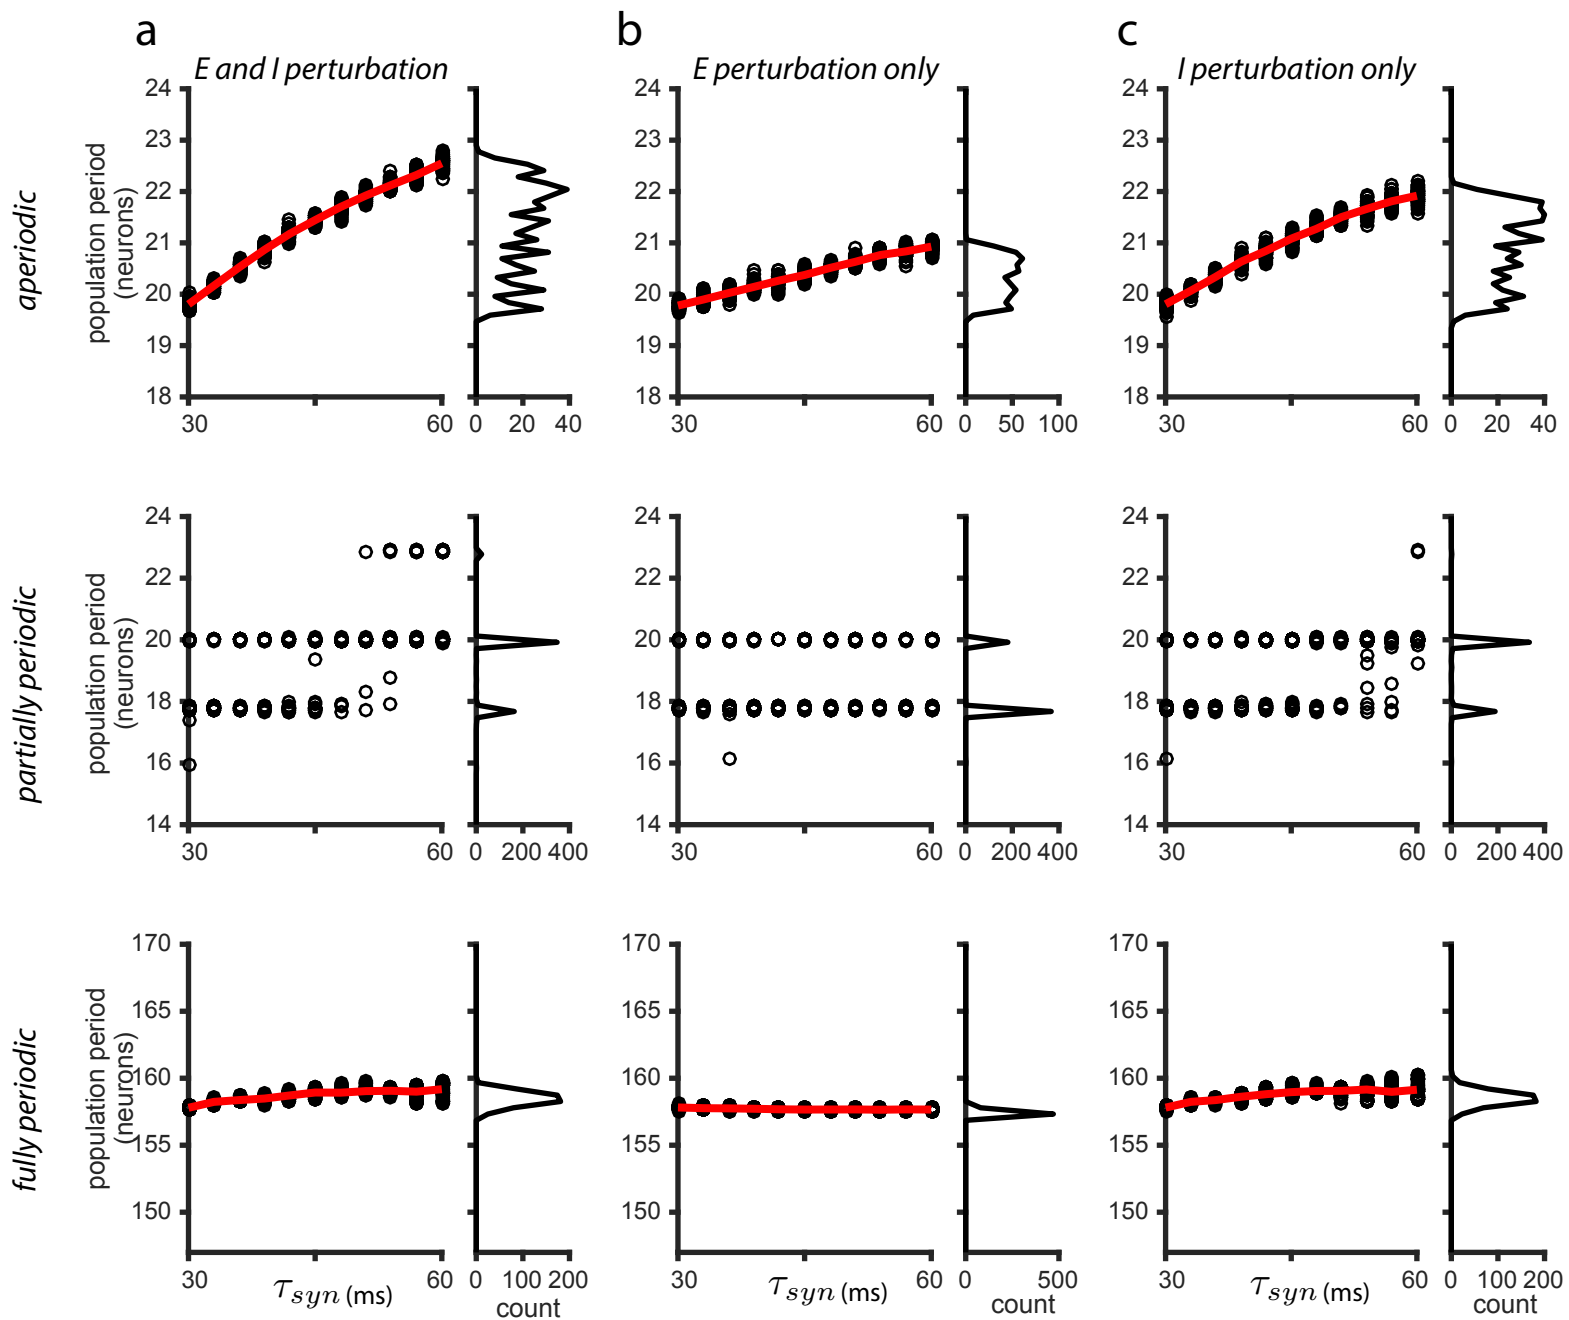

Supplement: supp [file elife_poa_e33503_Figure_5_figure_supplement_2.pdf › elife_poa_e33503_Figure_5_figure_supplement_2.pdf]

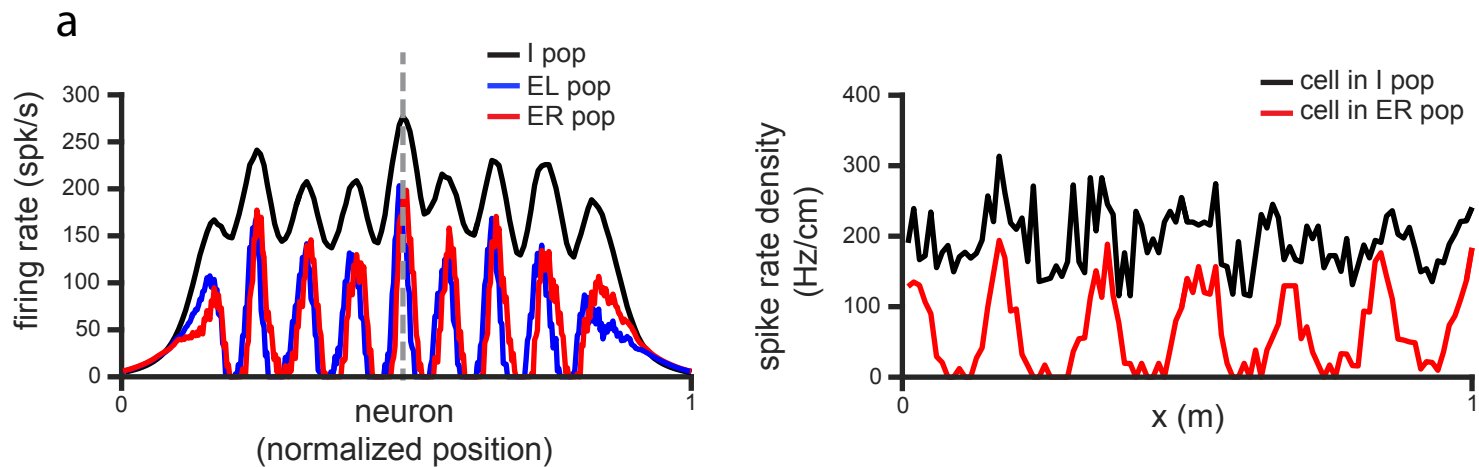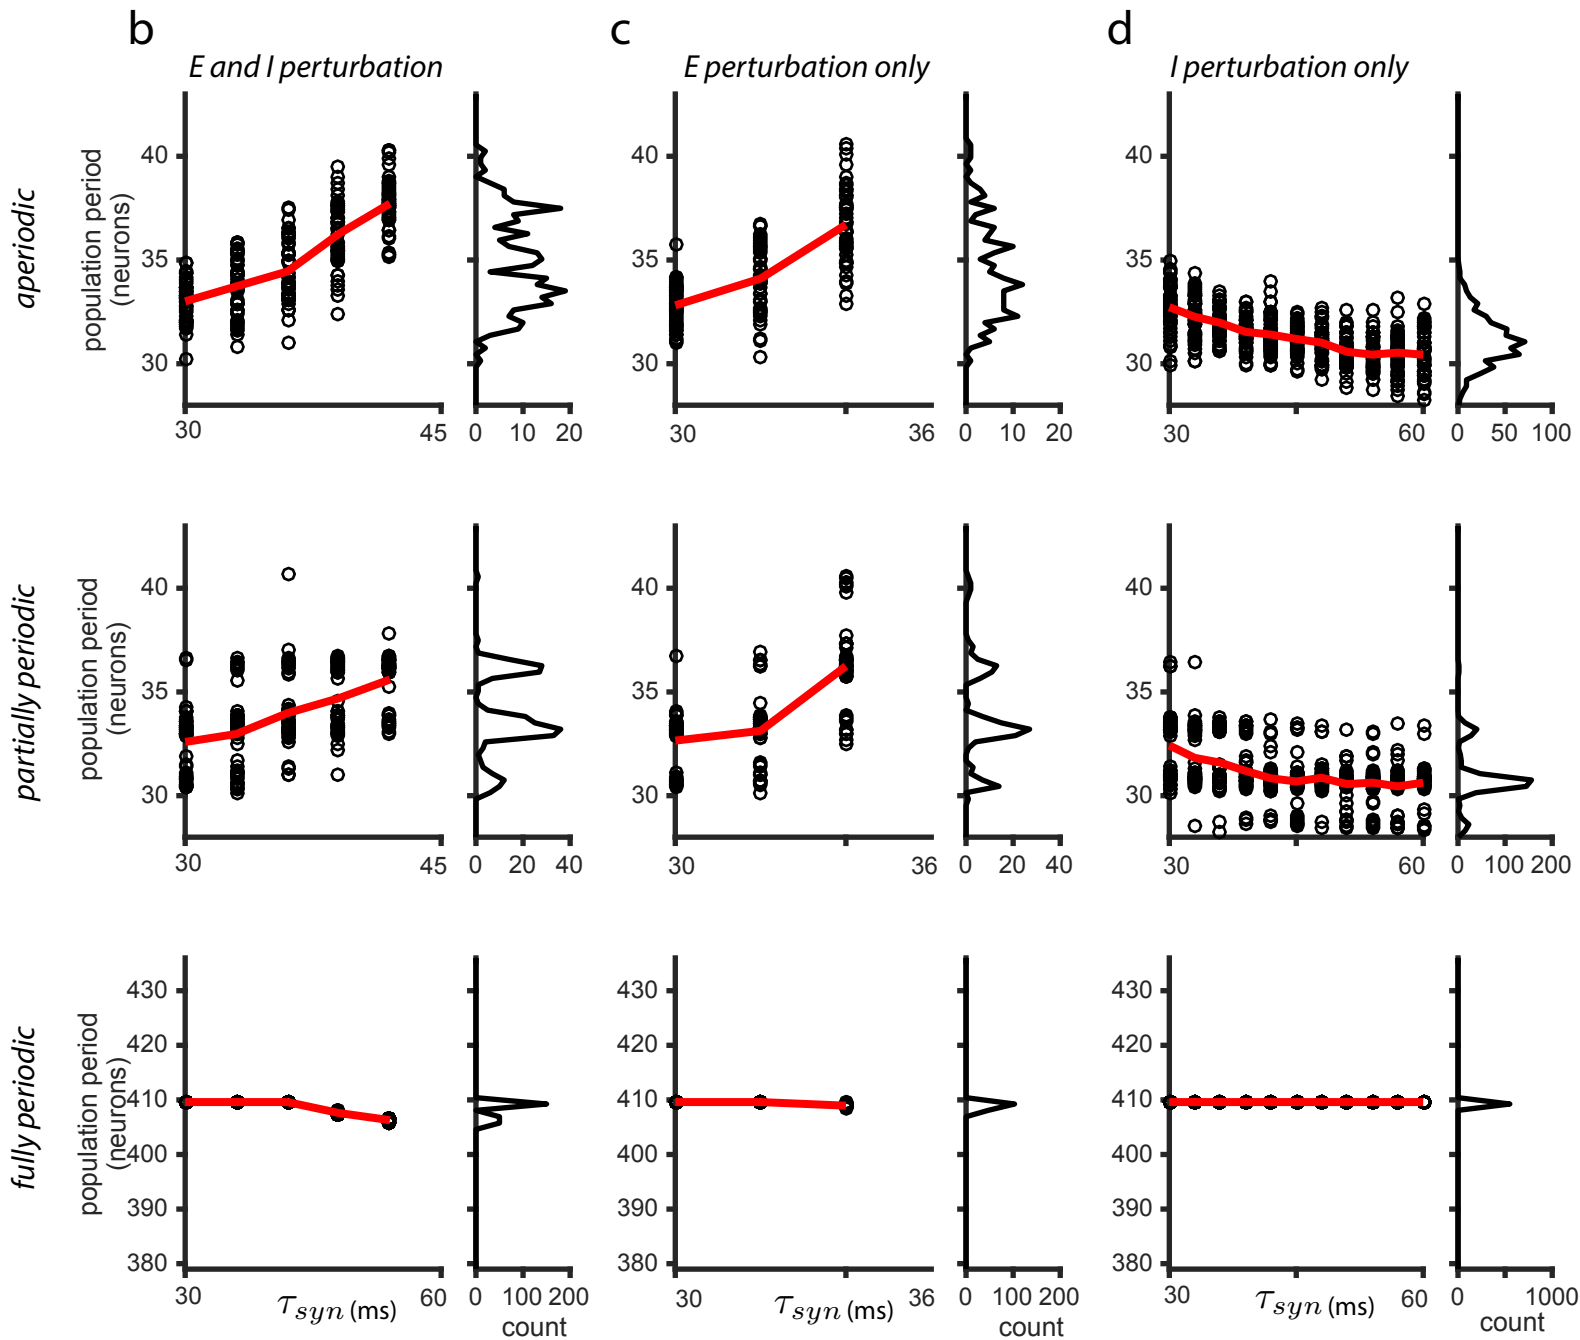

Supplement: supp [file elife_poa_e33503_Figure_5_figure_supplement_4.pdf › elife_poa_e33503_Figure_5_figure_supplement_4.pdf]

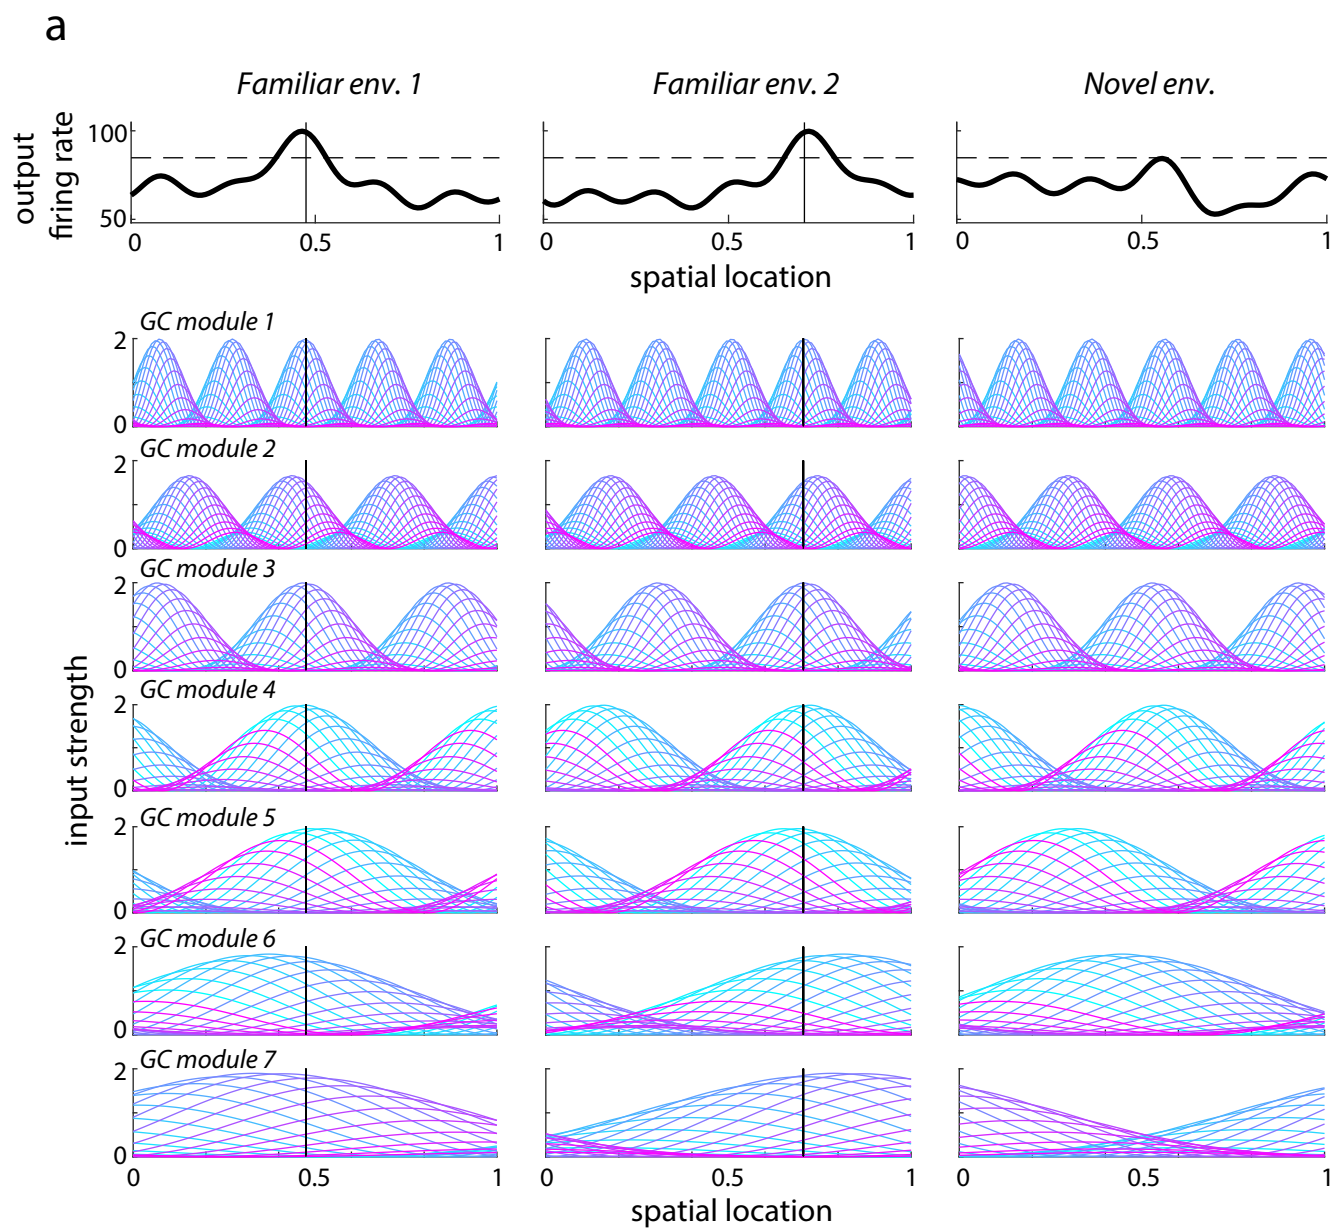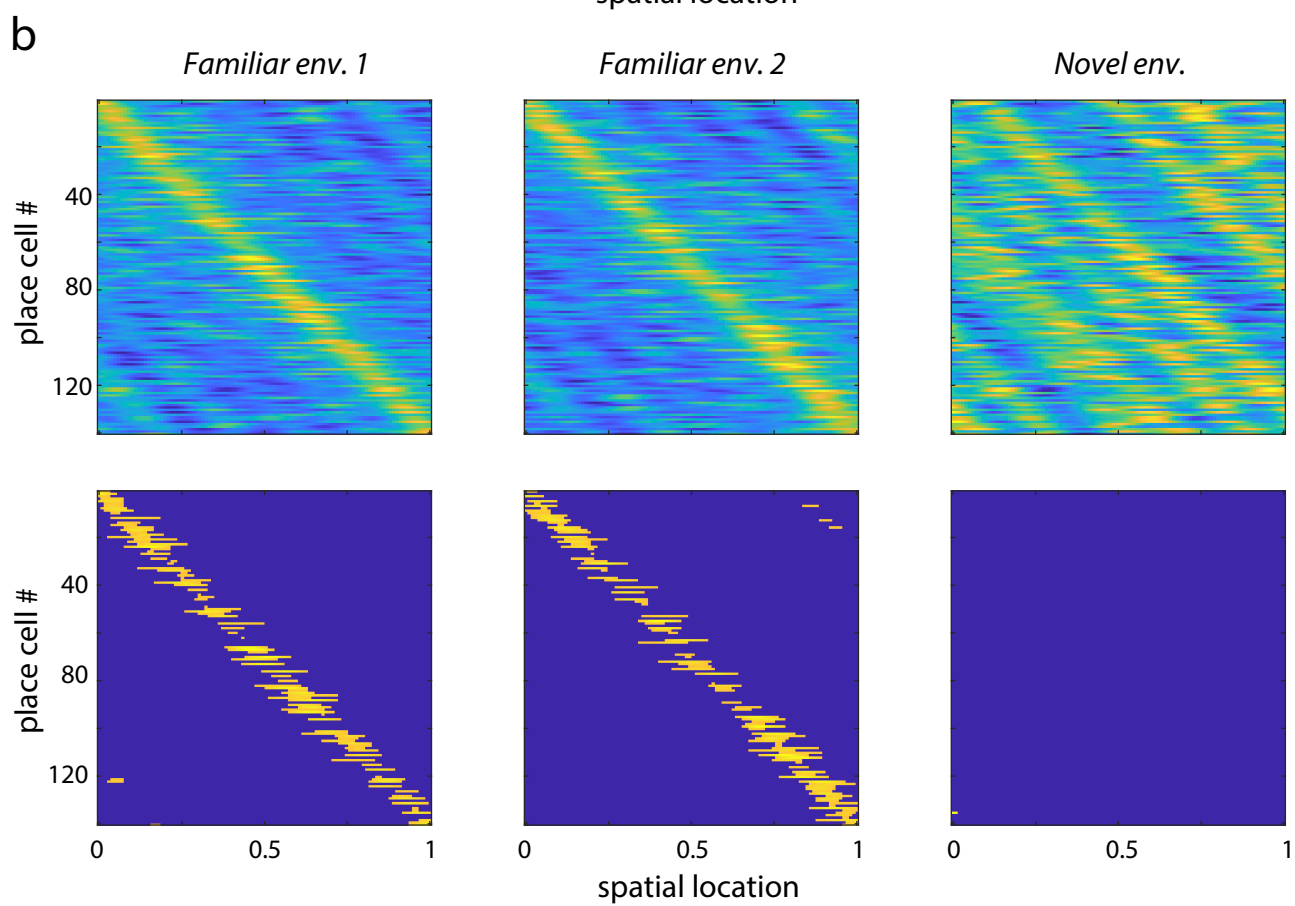

Supplement: supp [file elife_poa_e33503_Figure_5_figure_supplement_5.pdf › elife_poa_e33503_Figure_5_figure_supplement_5.pdf]
